# Supplementary material for: Fungal Diversity Analysis of Grape Musts from Central Valley-Chile and Characterization of Potential New Starter Cultures
Source: MDPI journal article supplement (doi:10.3390/microorganisms8060956), 2020-06-24
Supplement: s1 [file s1]

**Table S4.** Network information. M and EF enriched correspond to ratios >20 between of the average relative abundance in M and EF of each OUT.

| OTU number   | Species                                 | Degree | Negative links | Positive links |
|--------------|-----------------------------------------|--------|----------------|----------------|
| <b>183</b>   | <b><i>Aureobasidium namibiae</i></b>    | 5      | 1              | 4              |
| 87           | <i>Botrytis porri</i>                   | 6      | 1              | 5              |
| <b>115</b>   | <b><i>Candida boleticola</i></b>        | 7      | 2              | 5              |
| <b>172</b>   | <b><i>Cladosporium ramotenellum</i></b> | 5      | 1              | 4              |
| 53           | <i>Hanseniaspora meyeri</i>             | 5      | 1              | 4              |
| 45           | <i>Hanseniaspora osmophila</i>          | 1      | 0              | 1              |
| 168          | <i>Hanseniaspora osmophila</i>          | 3      | 0              | 3              |
| 138          | <i>Hanseniaspora osmophila</i>          | 8      | 6              | 2              |
| 14           | <i>Hanseniaspora uvarum</i>             | 4      | 1              | 3              |
| 117          | <i>Lachancea quebecensis</i>            | 4      | 1              | 3              |
| 201          | <i>Pichia kluyveri</i>                  | 3      | 0              | 3              |
| 164          | <i>Saccharomyces bayanus</i>            | 6      | 3              | 3              |
| <b>142</b>   | <b><i>Saccharomyces bayanus</i></b>     | 8      | 2              | 6              |
| 126          | <i>Saccharomyces cariocanus</i>         | 7      | 3              | 4              |
| <u>193</u>   | <u><i>Saccharomyces cerevisiae</i></u>  | 7      | 4              | 3              |
| 76           | <i>Saccharomyces cerevisiae</i>         | 5      | 2              | 3              |
| <u>178</u>   | <u><i>Saccharomyces cerevisiae</i></u>  | 8      | 5              | 3              |
| 121          | <i>Saccharomyces eubayanus</i>          | 7      | 4              | 3              |
| 31           | <i>Saccharomyces kudriavzevii</i>       | 6      | 3              | 3              |
| 59           | <i>Saccharomyces mikatae</i>            | 1      | 0              | 1              |
| 57           | <i>Torulaspora delbrueckii</i>          | 2      | 0              | 2              |
| <b>131</b>   | <b>unidentified</b>                     | 4      | 0              | 4              |
| 82           | unidentified                            | 4      | 0              | 4              |
| <b>Total</b> |                                         |        | 40             | 76             |

bold M enriched, underlined EF enriched
