# Supplementary material for: Fungal Diversity Analysis of Grape Musts from Central Valley-Chile and Characterization of Potential New Starter Cultures
Source: MDPI journal article supplement (doi:10.3390/microorganisms8060956), 2020-06-24
Supplement: s1 [file s1]

**Table S5.** Identity, ITS region size and GenBank accession numbers of the isolated yeasts.

| <b>ID</b>       | <b>Species</b>                   | <b>Identity</b> | <b>Size (bp)<br/>ITS region</b> | <b>Accession<br/>number</b> |
|-----------------|----------------------------------|-----------------|---------------------------------|-----------------------------|
| CuricoValley_1  | <i>Zygotrulaspora florentina</i> | 97%             | 611                             | MN915116                    |
| CuricoValley_2  | <i>Torulaspora delbrueckii</i>   | 97%             | 798                             | MN915117                    |
| CuricoValley_3  | <i>Saccharomyces uvarum</i>      | 99%             | 838                             | MN915118                    |
| CuricoValley_4  | <i>Pichia fermentans</i>         | 97%             | 445                             | MN915119                    |
| CuricoValley_5  | <i>Saccharomyces cerevisiae</i>  | 99%             | 843                             | MN915120                    |
| CuricoValley_6  | <i>Starmerella bacillaris</i>    | 95%             | 460                             | MN915121                    |
| CuricoValley_7  | <i>Metschnikowia pulcherrima</i> | 99%             | 383                             | MN915122                    |
| CuricoValley_9  | <i>Pichia membranifaciens</i>    | 99%             | 477                             | MN915124                    |
| CuricoValley_10 | <i>Pichia manshurica</i>         | 94%             | 461                             | MN915125                    |
