# Supplementary material for: Fungal Diversity Analysis of Grape Musts from Central Valley-Chile and Characterization of Potential New Starter Cultures
Source: MDPI journal article supplement (doi:10.3390/microorganisms8060956), 2020-06-24
Supplement: s1 [file s1]

**Table S3.** Physicochemical parameters from unfermented musts.

| <b>Physicochemical parameter</b> | <b>Must 2016</b> | <b>Must 2017</b> |
|----------------------------------|------------------|------------------|
| Total acidity (g/L)              | 6.71 ± 0.4       | 6.43 ± 0.2       |
| pH                               | 3.21 ± 0.1       | 3.13 ± 0.3       |
| Volatile acidity (g/L)           | 0.31 ± 0.2       | 0.29 ± 0.1       |
| Reducing sugars (g/L)            | 242 ± 9.0        | 237 ± 6.0        |
| Alcohol (% v/v)                  | 0.00 ± 0.01      | 0.01 ± 0.01      |
