# Supplementary material for: Fungal Diversity Analysis of Grape Musts from Central Valley-Chile and Characterization of Potential New Starter Cultures
Source: MDPI journal article supplement (doi:10.3390/microorganisms8060956), 2020-06-24
Supplement: s1 [file s1]

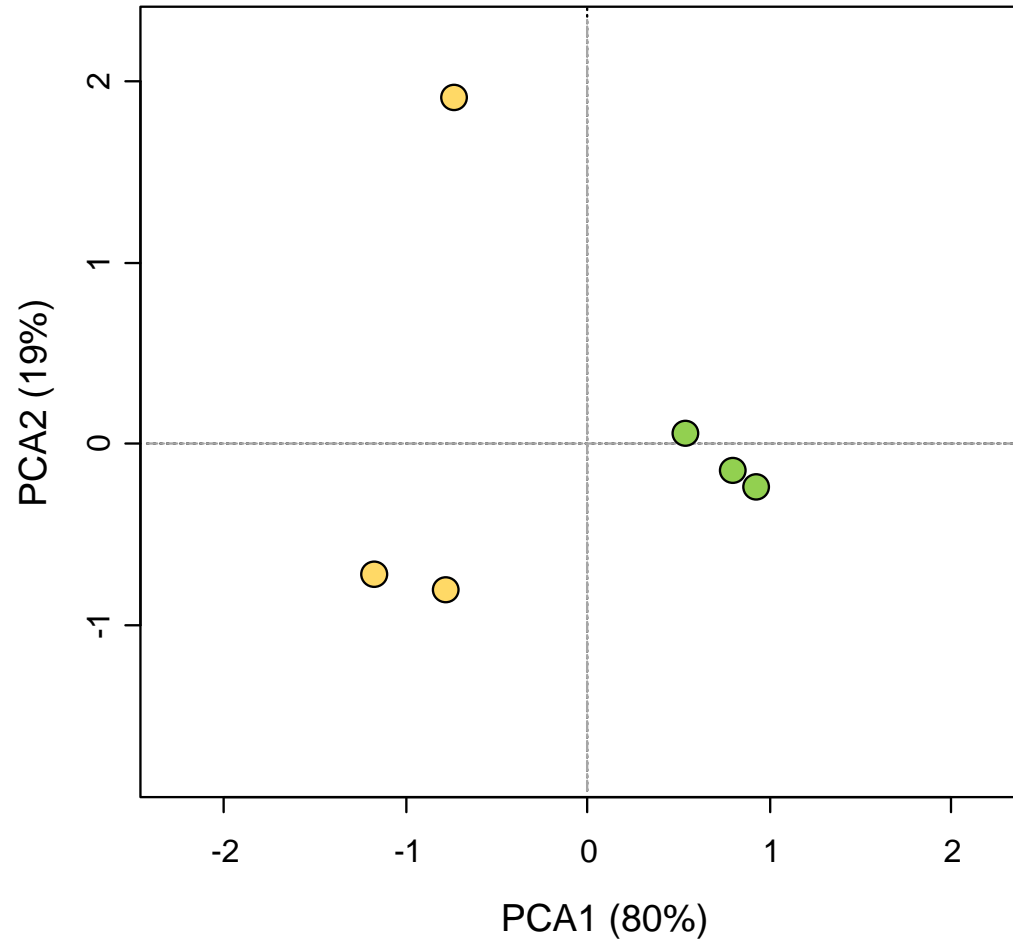

**Figure S1.** PCA ordination diagram of fungal relative abundance data on M samples (Table S1). Yellow dots represent M samples from the first season; green dots represent M samples from the second season.
