# Supplementary material for: Fungal Diversity Analysis of Grape Musts from Central Valley-Chile and Characterization of Potential New Starter Cultures
Source: MDPI journal article supplement (doi:10.3390/microorganisms8060956), 2020-06-24
Supplement: s1 [file s1]

**Table S2.** Alpha diversity. Microbial diversity indicated by Shannon diversity and Chao-1 indices. Average values and standard errors are shown. Calculations were based on OTU tables rarefied to the same depth of 55,000 sequences.

| Alpha-diversity index | M 2016                  | M 2017                  | EF 2016                  | EF 2017                    |
|-----------------------|-------------------------|-------------------------|--------------------------|----------------------------|
| Shannon index         | 1.32 ± 0.0 <sup>a</sup> | 1.42 ± 0.1 <sup>a</sup> | 0.72 ± 0.0 <sup>b</sup>  | 0.60 ± 0.1 <sup>b</sup>    |
| Chao-1 index          | 71.3 ± 7.7 <sup>a</sup> | 94.4 ± 2.4 <sup>b</sup> | 67.4 ± 10.0 <sup>a</sup> | 93.5 ± 11.0 <sup>a,b</sup> |

Different letters indicate significant differences between samples for the distinct alpha diversity tests (ANOVA, p < 0.05)
