# Supplementary figures and images for: Fungal Diversity Analysis of Grape Musts from Central Valley-Chile and Characterization of Potential New Starter Cultures
Source: MDPI journal article supplement (doi:10.3390/microorganisms8060956), 2020-06-24

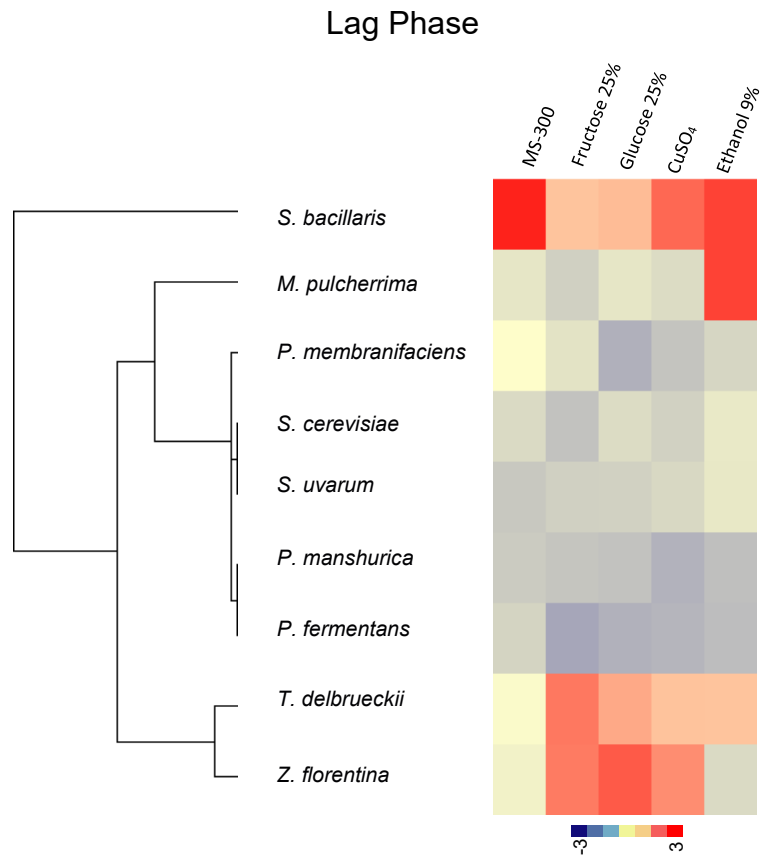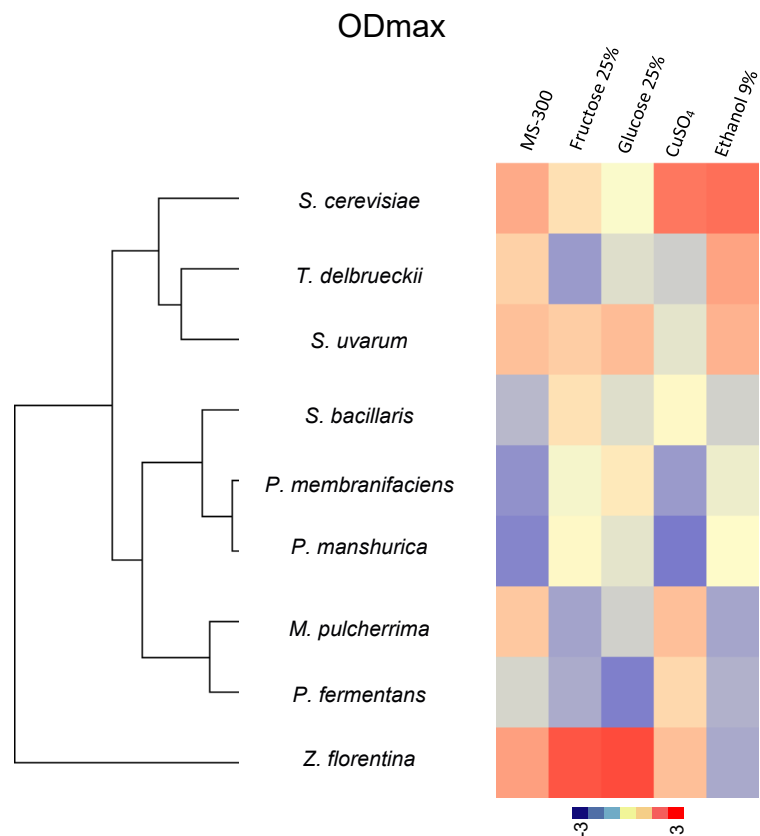

Figure S2. Heatmaps for (A) Lag phase and (B) ODmax.

Supplement: s1 [file s1]
